# Supplementary material for: Safety, Pharmacokinetics, and Drug-Drug Interaction Potential of Intravenous Durlobactam, a β-Lactamase Inhibitor, in Healthy Subjects
Source: PubMed Central journal article supplement (PMC7318034; doi:10.1128/aac.00071-20), 2020-06-23
Supplement: AAC.00071-20-s0001.pdf [file AAC.00071-20-s0001.pdf]

Supplemental Data

Table S1. Summary of Urine PK Parameters for Durlobactam for Cohorts 6, 7, and 8 (PK Parameters Population)

| Cohort | Dose (g) | Statistics | CL <sub>r</sub> (mL/hour) | F <sub>e</sub> (%) | A <sub>e</sub> (mg) |
|--------|----------|------------|---------------------------|--------------------|---------------------|
| 6      | 4        | n          | 4                         | 4                  | 4                   |
|        |          | Mean       | 7947.08                   | 76.4345            | 3057.384            |
|        |          | SD         | 1222.484                  | 11.12174           | 444.862             |
|        |          | Min        | 6419.0                    | 63.095             | 2523.81             |
|        |          | Median     | 8018.75                   | 77.8635            | 3114.55             |
|        |          | Max        | 9331.8                    | 86.916             | 3476.63             |
| 7      | 8        | n          | 5                         | 5                  | 5                   |
|        |          | Mean       | 6524.34                   | 55.0196            | 4401.576            |
|        |          | SD         | 3294.011                  | 25.48131           | 2038.512            |
|        |          | Min        | 1173.8                    | 11.525             | 921.99              |
|        |          | Median     | 7778.70                   | 58.8180            | 4705.45             |
|        |          | Max        | 9848.9                    | 73.565             | 5885.20             |
| 8      | 1        | n          | 5                         | 5                  | 5                   |
|        |          | Mean       | 3323.60                   | 58.2604            | 582.604             |
|        |          | SD         | 1332.995                  | 3.36137            | 33.613              |
|        |          | Min        | 1003.2                    | 55.550             | 555.50              |
|        |          | Median     | 3962.10                   | 57.3870            | 573.87              |
|        |          | Max        | 4170.0                    | 64.009             | 640.09              |

A<sub>e</sub>: cumulative excretion of unchanged drug in urine; CL<sub>r</sub>: urinary clearance; F<sub>e</sub>: fraction excreted unchanged in urine; Max: maximum; Min: minimum; n: number of subject in the category; SD: standard deviation.

8 **Table S2. The First 48 Hours: Summary of Urine PK Parameters for Durlobactam (PK**  
 9 **Parameters Population)**

| Cohort | Dose <sup>a</sup><br>(g) | Statistics | Urine<br>Volume<br>(mL) | F <sub>e</sub><br>(%) | A <sub>e</sub><br>(mg) | CL <sub>r</sub> <sup>b</sup><br>(mL/hour) |
|--------|--------------------------|------------|-------------------------|-----------------------|------------------------|-------------------------------------------|
| 9      | 2.00                     | n          | 6                       | 6                     | 6                      | 5                                         |
|        |                          | Mean       | 4849.3                  | 47.662                | 953.242                | 14286.10                                  |
|        |                          | SD         | 1812.93                 | 12.528                | 250.571                | 3464.310                                  |
|        |                          | Median     | 5408.5                  | 51.57                 | 1031.41                | 13208.70                                  |
| 10     | 4.00                     | n          | 6                       | 6                     | 6                      | 6                                         |
|        |                          | Mean       | 5258.8                  | 53.939                | 2157.551               | 16338.13                                  |
|        |                          | SD         | 2586.91                 | 13.869                | 554.773                | 4346.491                                  |
|        |                          | Median     | 5065.5                  | 57.21                 | 2288.24                | 17459.05                                  |
| 11     | 8.00                     | n          | 6                       | 6                     | 6                      | 5                                         |
|        |                          | Mean       | 3527.8                  | 56.699                | 4535.949               | 21837.96                                  |
|        |                          | SD         | 1103.93                 | 27.878                | 2230.256               | 4233.911                                  |
|        |                          | Median     | 3498.5                  | 65.06                 | 5204.73                | 23503.80                                  |
| 12     | 16.00                    | n          | 6                       | 6                     | 6                      | 4                                         |
|        |                          | Mean       | 5334.7                  | 55.354                | 8856.594               | 18449.33                                  |
|        |                          | SD         | 2248.02                 | 13.973                | 2235.642               | 6556.986                                  |
|        |                          | Median     | 4759.5                  | 49.25                 | 7879.32                | 18404.50                                  |

10 A<sub>e</sub>: cumulative excretion of unchanged drug in urine; CL<sub>r</sub>: urinary clearance; F<sub>e</sub>: fraction excreted unchanged in urine; n: number  
 11 of subject in the category; PK: pharmacokinetic; SD: standard deviation.

12 a. Dose calculated over 48 hours (ie 8 individual doses).

13 b. In subjects where a complete 48-hour collection interval was not available, CL<sub>r</sub> was not calculated.

14 **Table S2. Following the Final Dose: Summary of Urine PK Parameters for Durlobactam**  
 15 **(PK Parameters Population)**

| Cohort | Dose <sup>a</sup><br>(g) | Statistics | Urine<br>Volume<br>(mL) | F <sub>e</sub><br>(%) | A <sub>e</sub><br>(mg) | CL <sub>r</sub><br>(mL/hour) |
|--------|--------------------------|------------|-------------------------|-----------------------|------------------------|------------------------------|
| 9      |                          | n          | 6                       | 6                     | 6                      | 5                            |
|        | 0.250                    | Mean       | 1703.500                | 56.473                | 141.184                | 5046.44                      |
|        | 0.000                    | SD         | 495.207                 | 25.196                | 62.990                 | 2916.824                     |
|        | 0.25                     | Median     | 1857.50                 | 60.48                 | 151.20                 | 4407.40                      |
| 10     |                          | n          | 4                       | 4                     | 4                      | 4                            |
|        | 0.500                    | Mean       | 1771.750                | 67.523                | 337.614                | 5736.98                      |
|        | 0.000                    | SD         | 933.486                 | 13.157                | 65.784                 | 1271.318                     |
|        | 0.50                     | Median     | 1802.00                 | 65.88                 | 329.39                 | 5773.85                      |
| 11     |                          | n          | 5                       | 5                     | 5                      | 5                            |
|        | 1.000                    | Mean       | 1350.400                | 65.711                | 657.112                | 5616.22                      |
|        | 0.000                    | SD         | 386.324                 | 11.922                | 119.221                | 1483.653                     |
|        | 1.00                     | Median     | 1306.00                 | 67.09                 | 670.87                 | 5878.20                      |
| 12     |                          | n          | 6                       | 6                     | 6                      | 5                            |
|        | 2.000                    | Mean       | 1638.333                | 69.336                | 1386.730               | 6460.44                      |
|        | 0.000                    | SD         | 606.565                 | 14.686                | 293.717                | 1043.593                     |
|        | 2.00                     | Median     | 1646.50                 | 63.93                 | 1278.52                | 6557.80                      |

16 A<sub>e</sub>: cumulative excretion of unchanged drug in urine; CL<sub>r</sub>: urinary clearance; F<sub>e</sub>: fraction excreted unchanged in urine; n: number  
 17 of subject in the category; PK: pharmacokinetic; SD: standard deviation.

18 a. Based on the final dose on Day 8.

19

20

21 **Table S3. Cohort 13: Selected Durlobactam and Sulbactam Urine PK Parameters (PK**  
 22 **Parameters Population)**

| Parameter        | Durlobactam      |                    | Sulbactam          |                    |
|------------------|------------------|--------------------|--------------------|--------------------|
|                  | Day 1<br>n = 6   | Day 5<br>n = 6     | Day 3<br>n = 5     | Day 5<br>n = 5     |
| $F_e$ (%)        | 40.964 (6.869)   | 49.963 (9.530)     | 69.189 (5.544)     | 66.417 (9.630)     |
| $A_e$ (mg)       | 409.644 (68.690) | 499.627 (95.305)   | 691.885 (55.442)   | 664.171 (96.295)   |
| $CL_r$ (mL/hour) | NC               | 4857.93 (1112.552) | 10142.88 (821.545) | 9169.60 (1610.915) |

23  $A_e$ : cumulative excretion of unchanged drug in urine;  $CL_r$ : urinary clearance;  $F_e$ : fraction excreted unchanged in urine; n: number  
 24 of subject in the category; NC: not countable; PK: pharmacokinetic.

25 **Table S3. Cohort 14: Mean (SD) Urine PK Parameters (PK Parameters Population)**

| Parameter        | Durlobactam          |                      |                                  | Sulbactam            |                      | Imipenem             |                        |                        |
|------------------|----------------------|----------------------|----------------------------------|----------------------|----------------------|----------------------|------------------------|------------------------|
|                  | Day 1<br>n = 6       | Day 5<br>n = 6       | Day 8<br>n = 6                   | Day 8<br>n = 5       | Day 3<br>n = 6       | Day 5<br>n = 6       | Day 8<br>n = 6         | Day 3<br>n = 6         |
| $F_e$ (%)        | 42.664<br>(10.805)   | 31.605<br>(9.774)    | 19.329<br>(8.5909)               | 47.935<br>(26.668)   | 50.418<br>(8.863)    | 50.711<br>(8.889)    | 38.063<br>(18.808)     | 84.282<br>(6.308)      |
| $A_e$ (mg)       | 426.643<br>(108.055) | 316.048<br>(97.736)  | 193.288<br>(85.909)              | 479.348<br>(266.683) | 252.090<br>(44.316)  | 253.557<br>(44.445)  | 190.318<br>(90.042)    | 421.411<br>(31.541)    |
| $CL_r$ (mL/hour) | NC                   | 3228.15<br>(1289.87) | 2127.60<br>(283.83) <sup>a</sup> | NC                   | 6100.50<br>(1843.92) | 6140.70<br>(1429.02) | 4192.140<br>(2212.249) | 7964.278<br>(1140.792) |

26  $A_e$ : cumulative excretion of unchanged drug in urine;  $CL_r$ : urinary clearance;  $F_e$ : fraction excreted unchanged in urine; n: number  
 27 of subject in the category; NC: not countable; PK: pharmacokinetic; SD: standard deviation.

28 a. n = 2.

29 **Table S3. Cohort 14: Day 8 Mean (SD) Imipenem and Cilastatin Urine PK Parameters**  
 30 **(Placebo Subjects)**

| Parameter        | Placebo           |                     |
|------------------|-------------------|---------------------|
|                  | Imipenem<br>n = 2 | Cilastatin<br>n = 2 |
| $F_e$ (%)        | 36.766 (11.368)   | 120.359 (9.364)     |
| $A_e$ (mg)       | 183.832 (56.842)  | 601.795 (46.820)    |
| $CL_r$ (mL/hour) | 4225.40 (1655.62) | 12385.50 (420.44)   |

31 *b.*  $A_e$ : cumulative excretion of unchanged drug in urine;  $CL_r$ : urinary clearance;  $F_e$ : fraction excreted unchanged in urine;  
 32 n: number of subject in the category; PK: pharmacokinetic; SD: standard deviation.

33

34 **Table S4. Cohort 15: Urine PK Parameters (PK Parameters Population)**

| Parameter<br>n (SD)             | Durlobactam          |                     | Sulbactam             |                      | Imipenem              |                                    | Day<br>n = 1     |
|---------------------------------|----------------------|---------------------|-----------------------|----------------------|-----------------------|------------------------------------|------------------|
|                                 | Day 1<br>n = 10      | Day 11<br>n = 10    | Day 1<br>n = 10       | Day 11<br>n = 10     | Day 1<br>n = 10       | Day 11<br>n = 10                   |                  |
| <b>F<sub>e</sub> (%)</b>        | 43.518<br>(11.601)   | 49.158<br>(18.278)  | 59.176<br>(13.995)    | 61.890<br>(18.383)   | 35.1762<br>(8.400)    | 54.343<br>(9.954)                  | 88.37<br>(18.55) |
| <b>A<sub>e</sub> (mg)</b>       | 3481.42<br>(928.042) | 491.58<br>(182.782) | 4734.10<br>(1119.623) | 618.896<br>(183.825) | 1407.051<br>(335.998) | 271.71<br>(49.770)                 | 3535.<br>(742.0) |
| <b>CL<sub>r</sub> (mL/hour)</b> | NC                   | NC                  | NC                    | NC                   | NC                    | 8184.04 <sup>a</sup><br>(2381.940) | NC               |

35 A<sub>e</sub>: cumulative excretion of unchanged drug in urine; CL<sub>r</sub>: urinary clearance; F<sub>e</sub>: fraction excreted unchanged in urine; n: number  
 36 of subject in the category; NC: not countable; PK: pharmacokinetic; SD: standard deviation.

37 a. n = 9.

38

39

40

41 **Table S5. Study Design**

42

43 Part A – Single Ascending Dose (n=6 DUR, n=2 placebo)

44 Cohort 1: single dose of 0.25 g IV DUR/placebo infused over 3 hours

45 Cohort 2: single dose of 0.5 g IV DUR/placebo infused over 3 hours

46 Cohort 3: single dose of 1.0 g IV DUR/placebo infused over 3 hours

47 Cohort 4: single dose of 1.0 g IV DUR/placebo infused over 2 hours

48 Cohort 5: single dose of 2.0 g IV DUR/placebo infused over 3 hours

49 Cohort 6: single dose of 4.0 g IV DUR/placebo infused over 3 hours

50 Cohort 7: single dose of 8.0 g IV DUR/placebo infused over 3 hours

51 Cohort 8 (n=8 elderly subjects [ $\geq 65$  years]): single dose of 1.0 g IV DUR/placebo infused over 3

52 hours

53

54 Part B – Multiple Ascending Dose (n=6 DUR, n=2 placebo)

55 Cohort 9: 0.25 g IV DUR/placebo infused over 3 hours q6h for 7 days and 1 dose on Day 8

56 Cohort 10: 0.5 g IV DUR/placebo infused over 3 hours q6h for 7 days and 1 dose on Day 8

57 Cohort 11: 1.0 g IV DUR/placebo infused over 3 hours q6h for 7 days and 1 dose on Day 8

58 Cohort 12: 2.0 g IV DUR/placebo infused over 3 hours q6h for 7 days and 1 dose on Day 8

59

60 Part C – Single Dose Drug Interaction

61 Cohort 13:

62 ○ Day 1 - 1.0 g IV DUR/placebo infused over 3 hours

63 ○ Day 3 - 1.0 g IV sulbactam infused over 3 hours

64 ○ Day 5 - 1.0 g IV DUR/placebo plus 1.0 g sulbactam infused over 3 hours at the same time

65 Cohort 14

66 ○ Day 1 - 1.0 g IV DUR/placebo infused over 3 hours

67 ○ Day 3 - 0.5 g IV imipenem/cilastatin infused over 30 minutes

68 ○ Day 5 - 1.0 g IV DUR/placebo over 3 hours plus 0.5 g imipenem/cilastatin over 30  
69 minutes at the same time as DUR/placebo

70 ○ Day 8 - 1.0 g IV DUR/placebo plus 1.0 g sulbactam over 3 hours at the same time plus

71 0.5 g imipenem/cilastatin over 30 minutes at the same time as DUR/placebo

72

73 Part D – Multiple Dose Drug Interaction
